# Supplementary material
Source: PubMed Central journal article supplement (PMC10337481)

**A**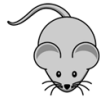

*Mist1CreERT;R26-tdTomato*

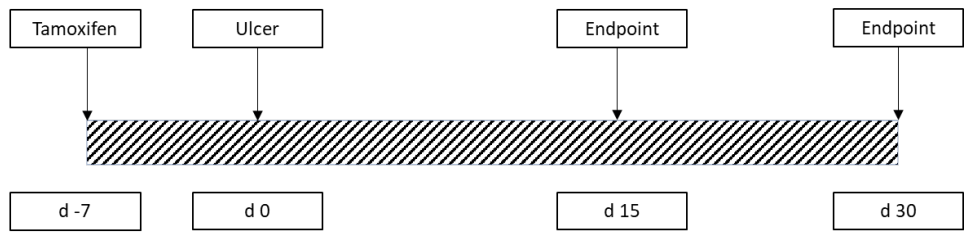**B**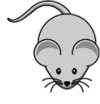

*Mist1CreERT;R26-tdTomato*

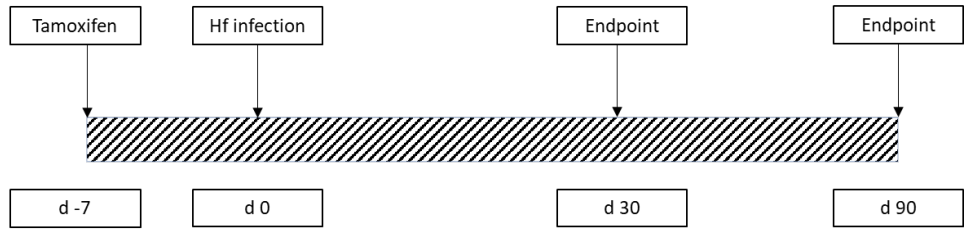**C**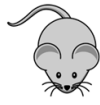

*CagCreERT;Wnt5aflox/flox*

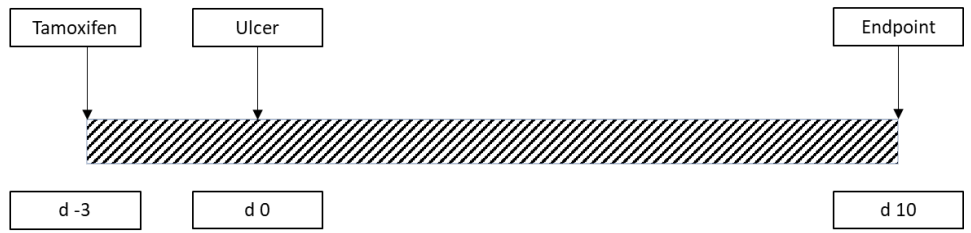**D**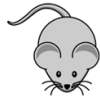

*Mist1CreERT;R26-tdTomato;  
Lgr5-DTR*

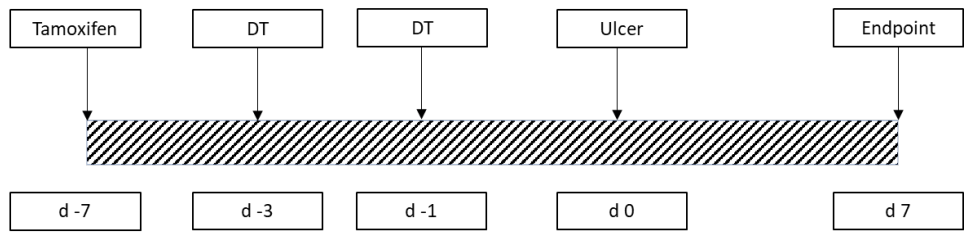

Supplement: NIHMS1912460-supplement-Supp1.pdf [file NIHMS1912460-supplement-Supp1.pdf]
