# Supplementary material
Source: PubMed Central journal article supplement (PMC10337481)

**A**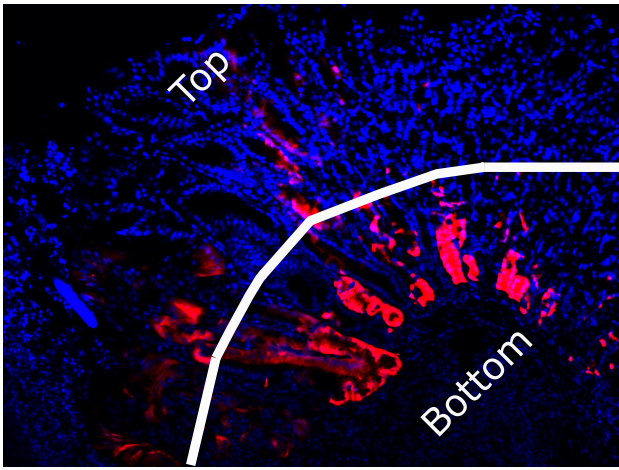**B**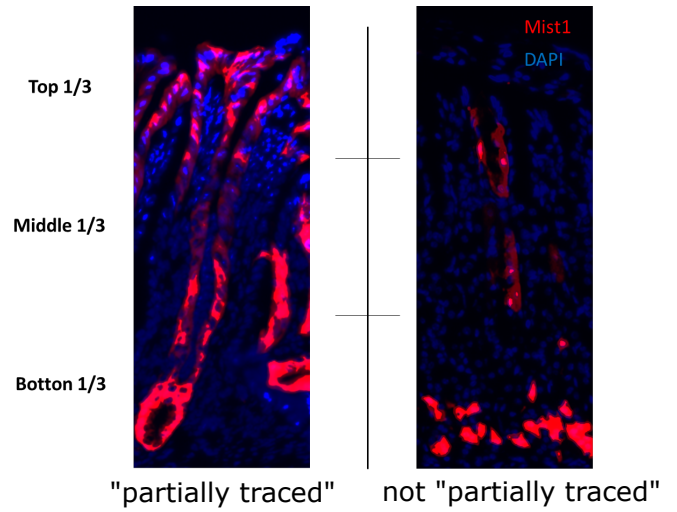**C**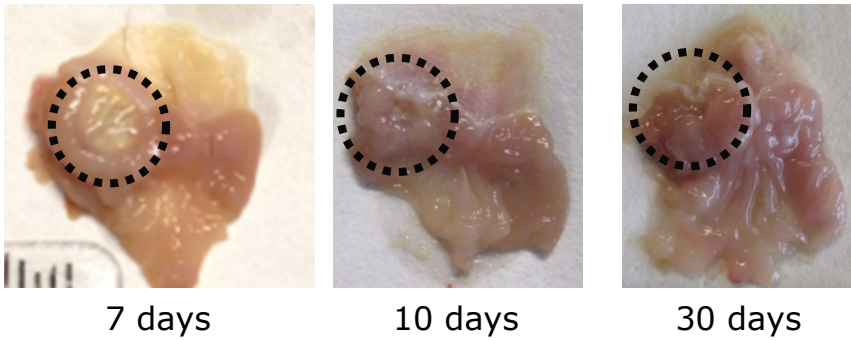**D**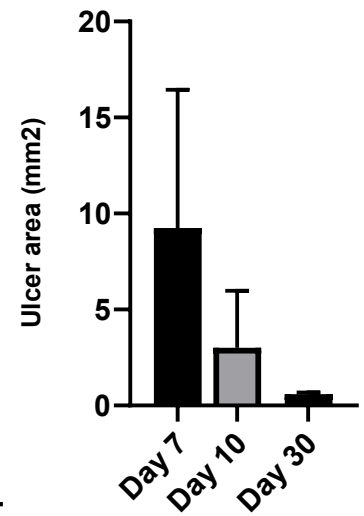**E**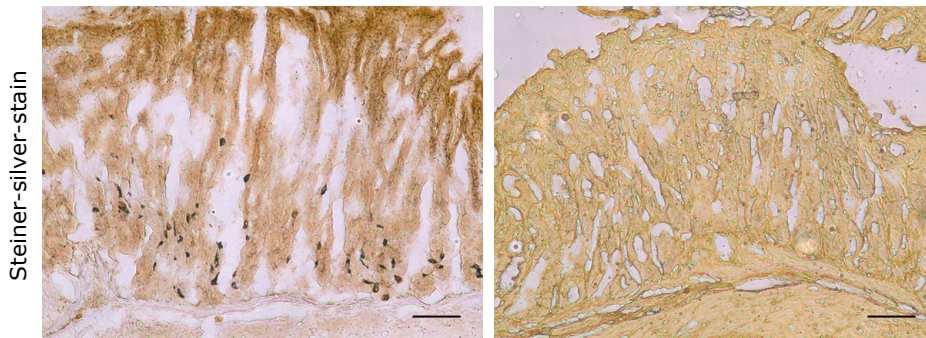**F**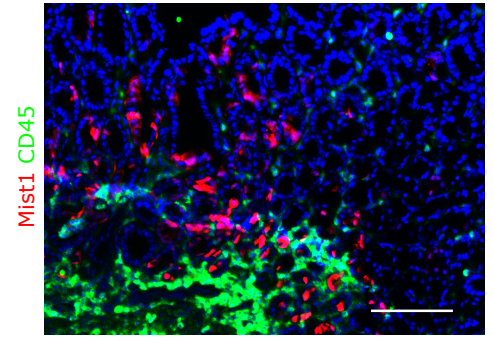**G**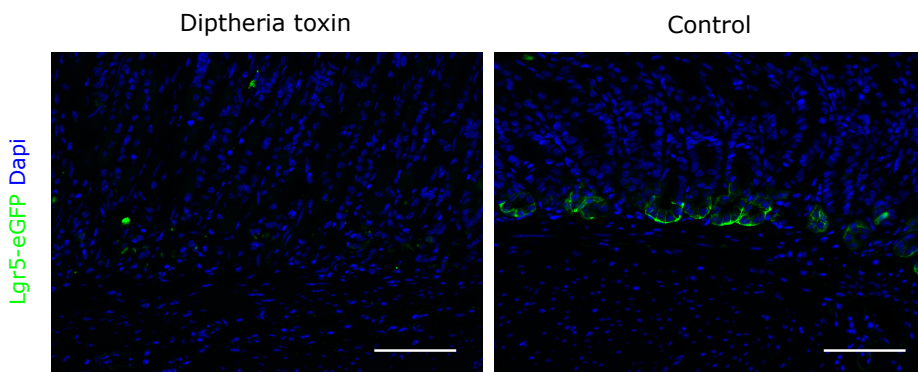**H**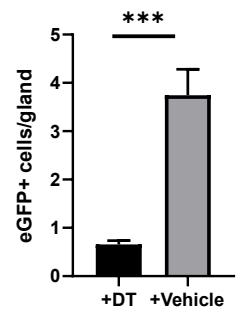**I**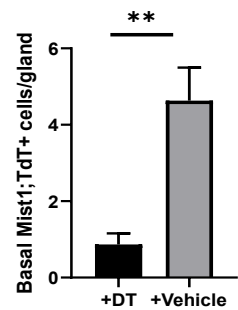

Supplement: NIHMS1912460-supplement-Supp2.pdf [file NIHMS1912460-supplement-Supp2.pdf]

**A**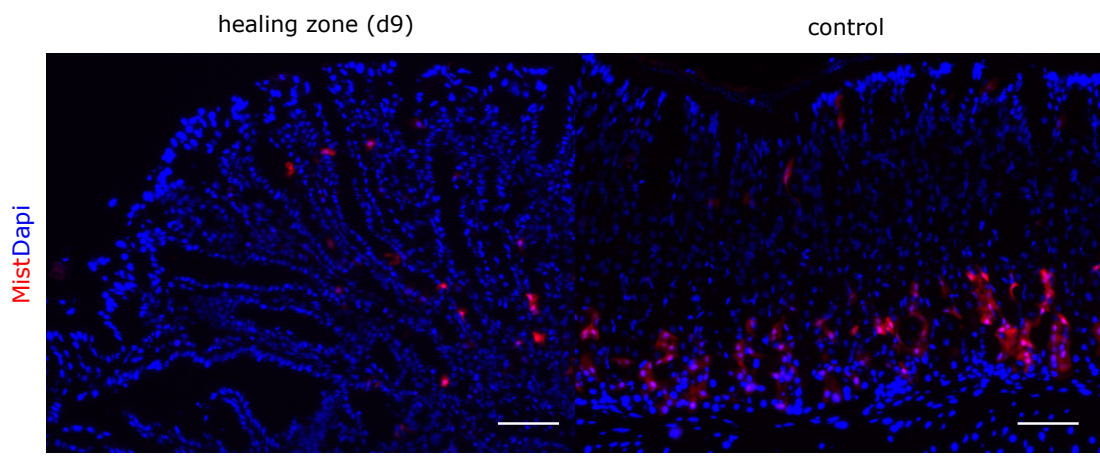**B**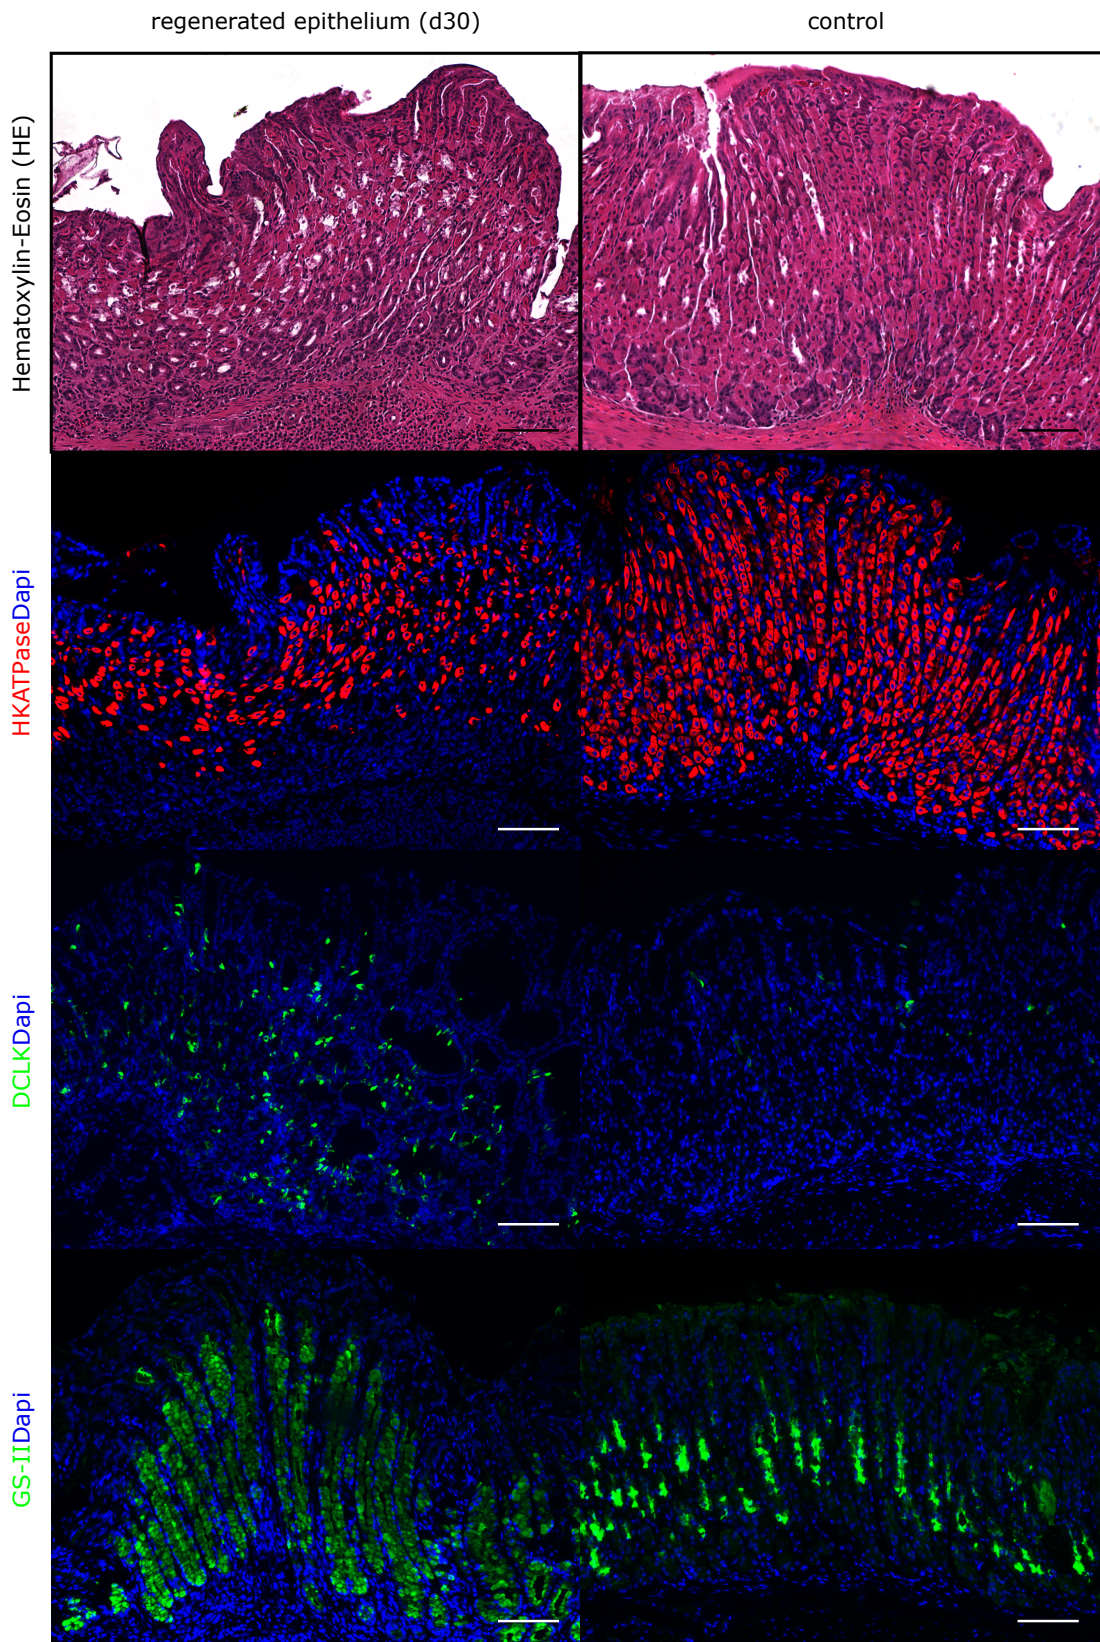

Supplement: NIHMS1912460-supplement-Supp3.pdf [file NIHMS1912460-supplement-Supp3.pdf]

**A**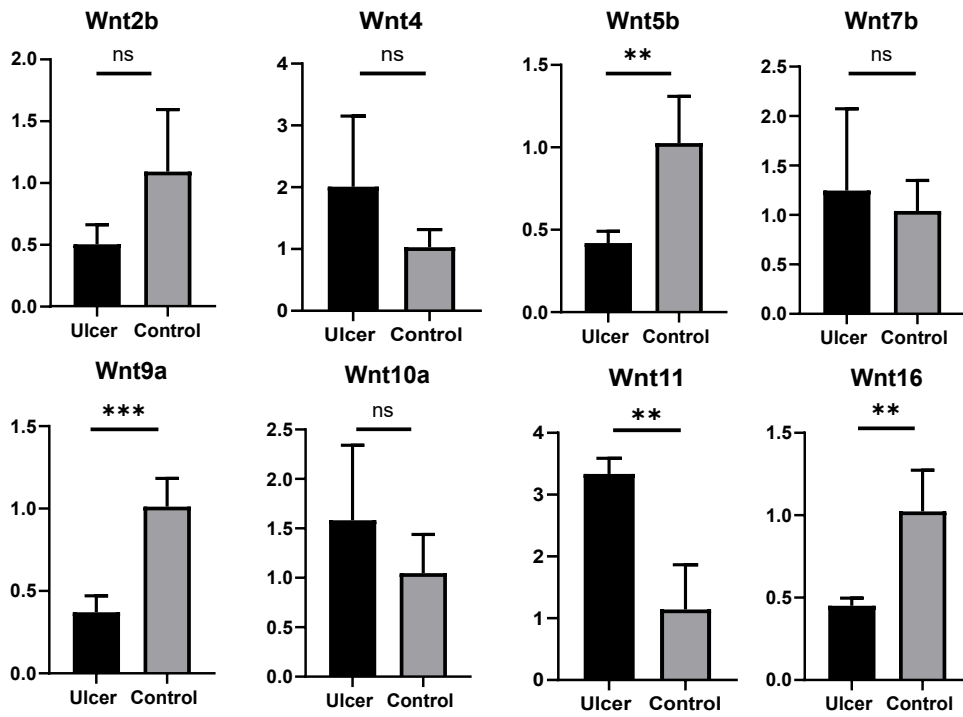**B**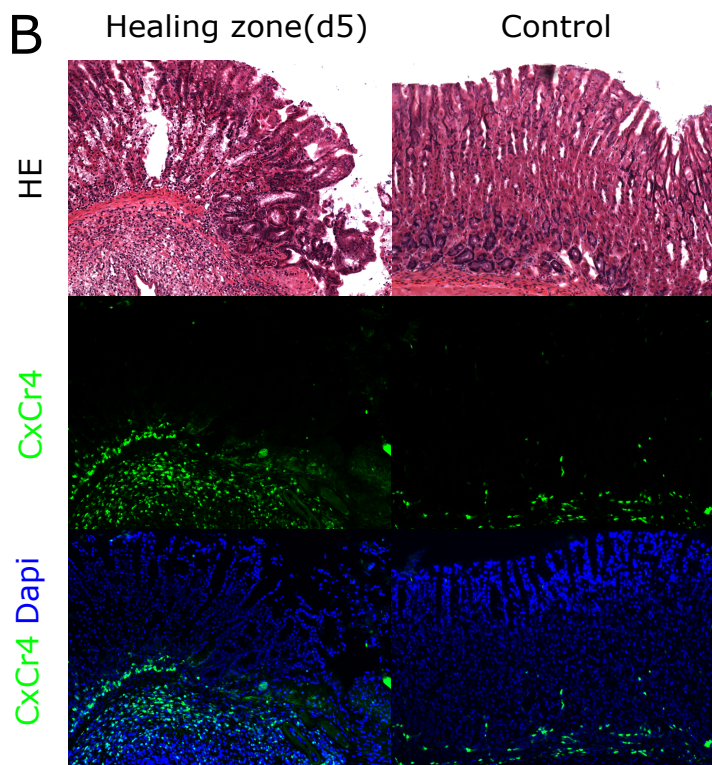**C**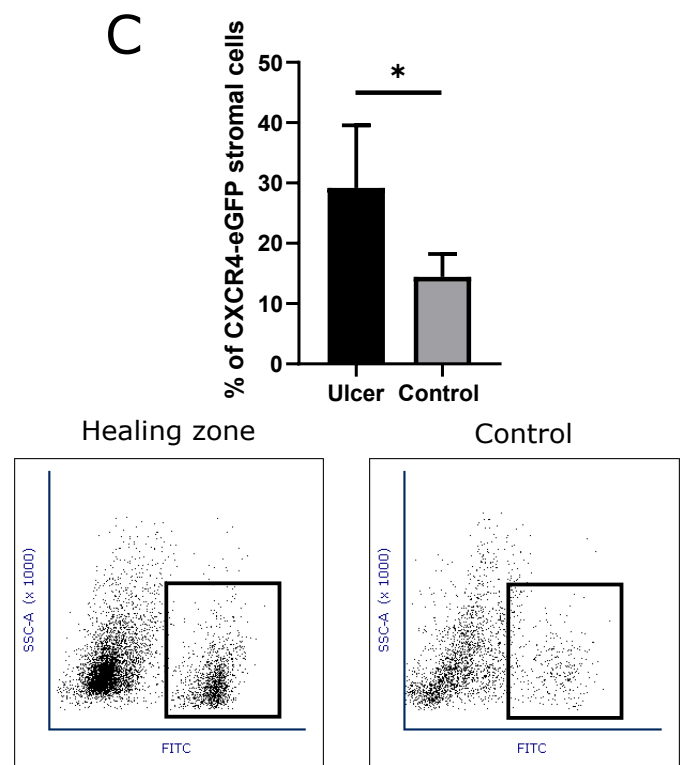**D**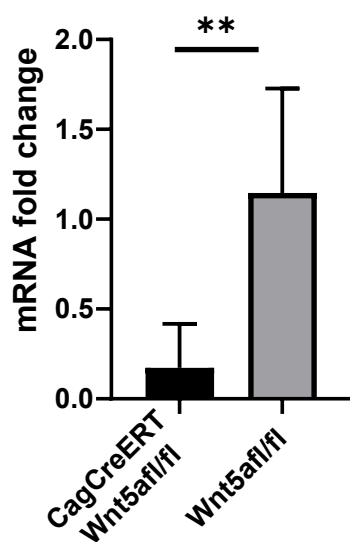**E**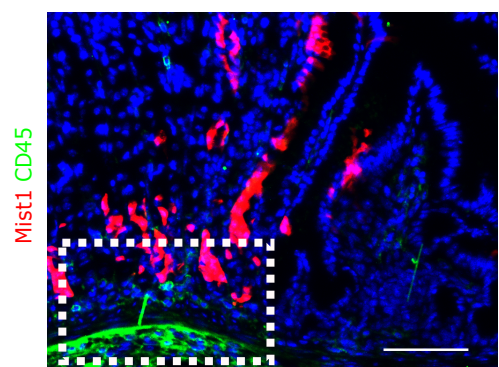

Supplement: NIHMS1912460-supplement-Supp4.pdf [file NIHMS1912460-supplement-Supp4.pdf]

**A**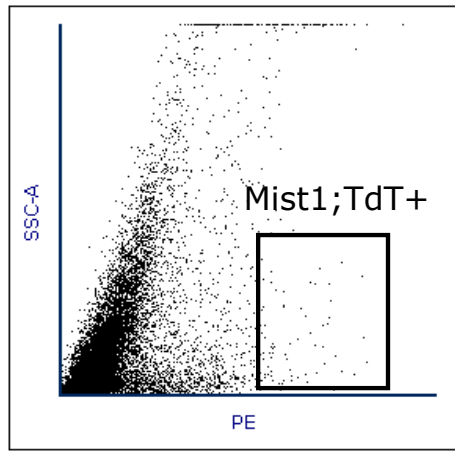**B**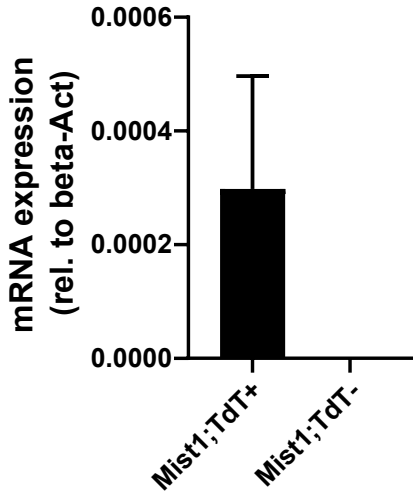**C**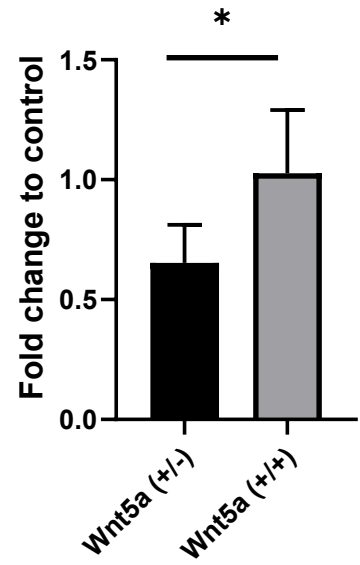**D**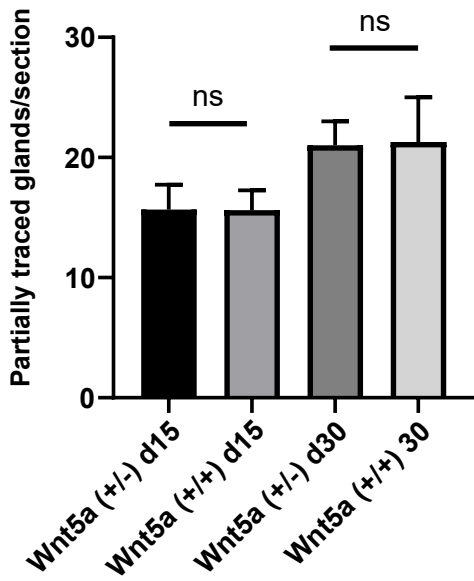**E**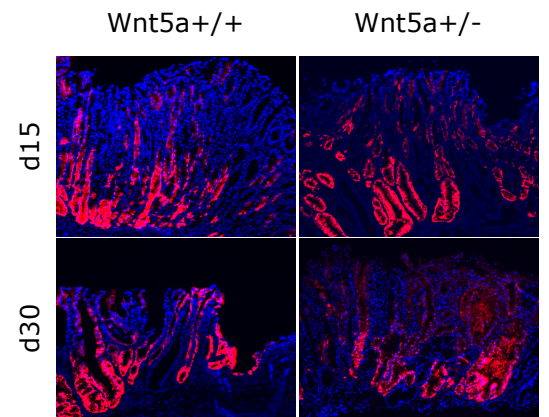**F**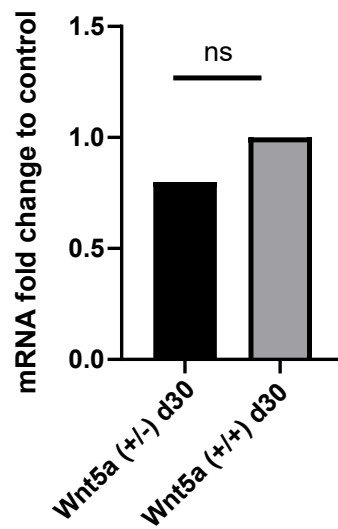

Supplement: NIHMS1912460-supplement-Supp5.pdf [file NIHMS1912460-supplement-Supp5.pdf]

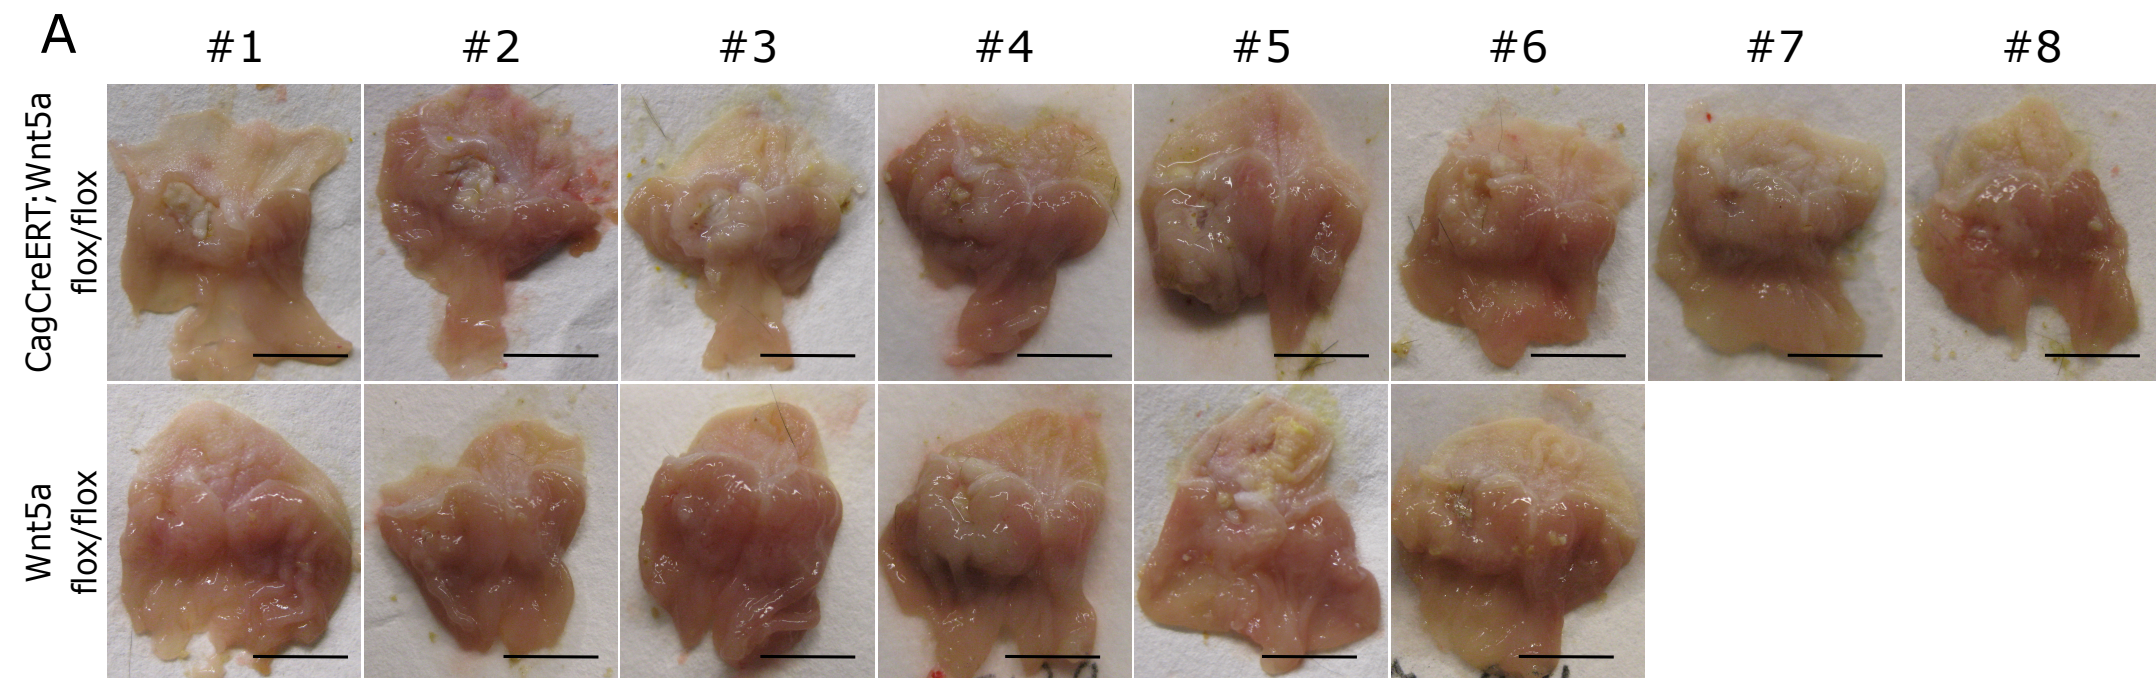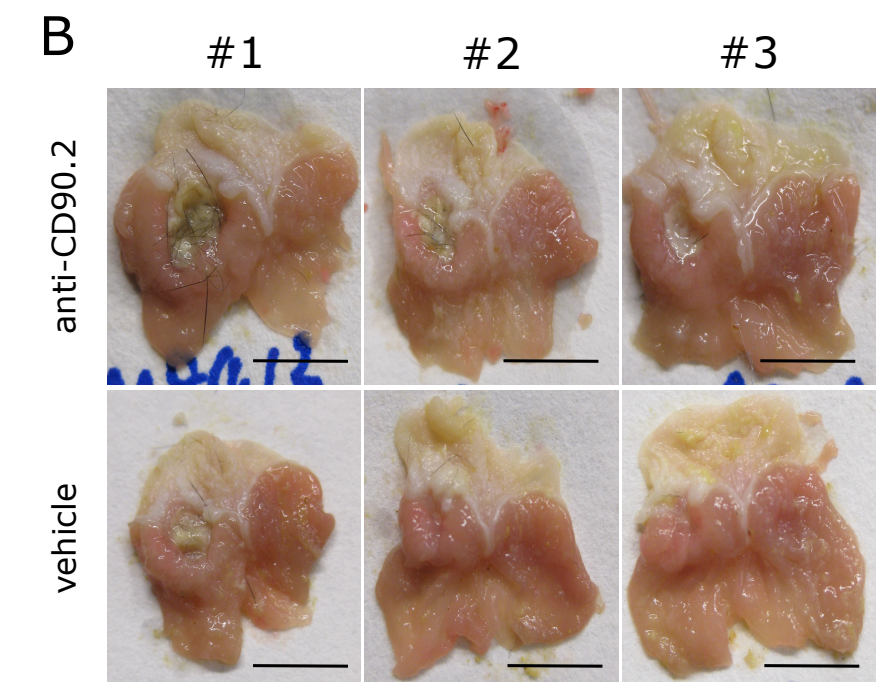

Supplement: NIHMS1912460-supplement-Supp6.pdf [file NIHMS1912460-supplement-Supp6.pdf]
